# Supplementary material
Source: ML conference proceedings conference paper supplement (https://proceedings.neurips.cc/paper_files/paper/2014/hash/09c6c3783b4a70054da74f2538ed47c6-Abstract.html)
Supplement: Supplementary file [file 09c6c3783b4a70054da74f2538ed47c6-Supplemental.zip]

## Supplementary Material

### Dynamic Environment Model Details

The architecture of the network used in the dynamic environment experiments in Section 4.2 was as follows. The retina received three patches centered around the chosen location at three scales. The first scale was a 6 by 6 patch sampled at full resolution, the second patch was 12 by 12 resized to 6 by 6, and the third patch was 24 by 24 resized to 6 by 6. The connectivity of the glimpse network was the same as the one used in the classification experiments described in Section 4, i.e. two fully connected layers. The core network consisted of 256 LSTM cells. At each step, the outputs of the LSTM were fed into three output networks. The first was a linear layer outputting the  $(x, y)$  of the next glimpse. The second was a linear layer with a single output that predicted the expected reward given the current state. The expected reward was used as a state-dependent baseline instead of the constant baseline used in the classification experiments. The third output layer was a linear layer with three outputs followed by a softmax nonlinearity. This softmax modeled the probabilities of the three possible actions (*left*, *right*, and *do nothing*). The input to the LSTM was a vector of zeros. Training was done by running the LSTM model until the ball reached the bottom and then updating the entire network using the algorithm described in Section 3.2.

### Policy Examples

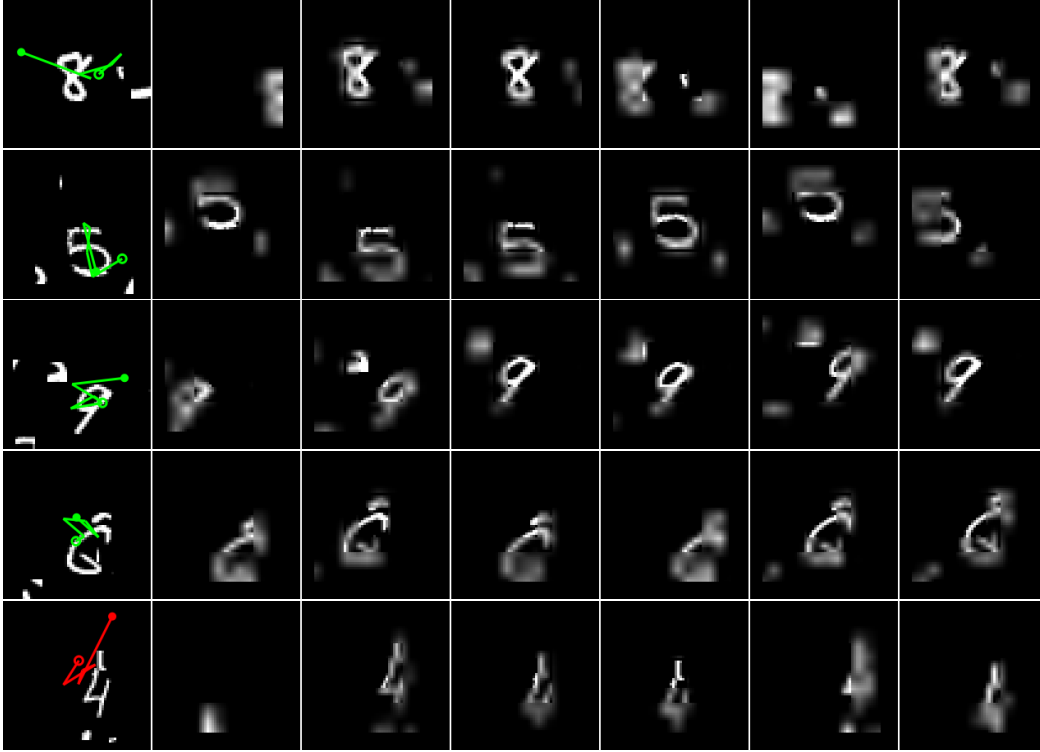

Figure 1: Examples of the learned policy on  $60 \times 60$  cluttered-translated MNIST task. Column 1: The input image from MNIST test set with glimpse path overlaid in green (correctly classified) or red (false classified). Columns 2-7: The six glimpses the network chooses. The center of each image shows the full resolution glimpse, the outer low resolution areas are obtained by upscaling the low resolution glimpses back to full image size. The glimpse paths clearly show that the learned policy avoids computation in empty or noisy parts of the input space and directly explores the area around the object of interest.

054  
055  
056  
057  
058  
059  
060  
061  
062  
063  
064  
065  
066  
067  
068  
069  
070  
071  
072  
073  
074  
075  
076  
077  
078  
079  
080  
081  
082  
083  
084  
085  
086  
087  
088  
089  
090  
091  
092  
093  
094  
095  
096  
097  
098  
099  
100  
101  
102  
103  
104  
105  
106  
107

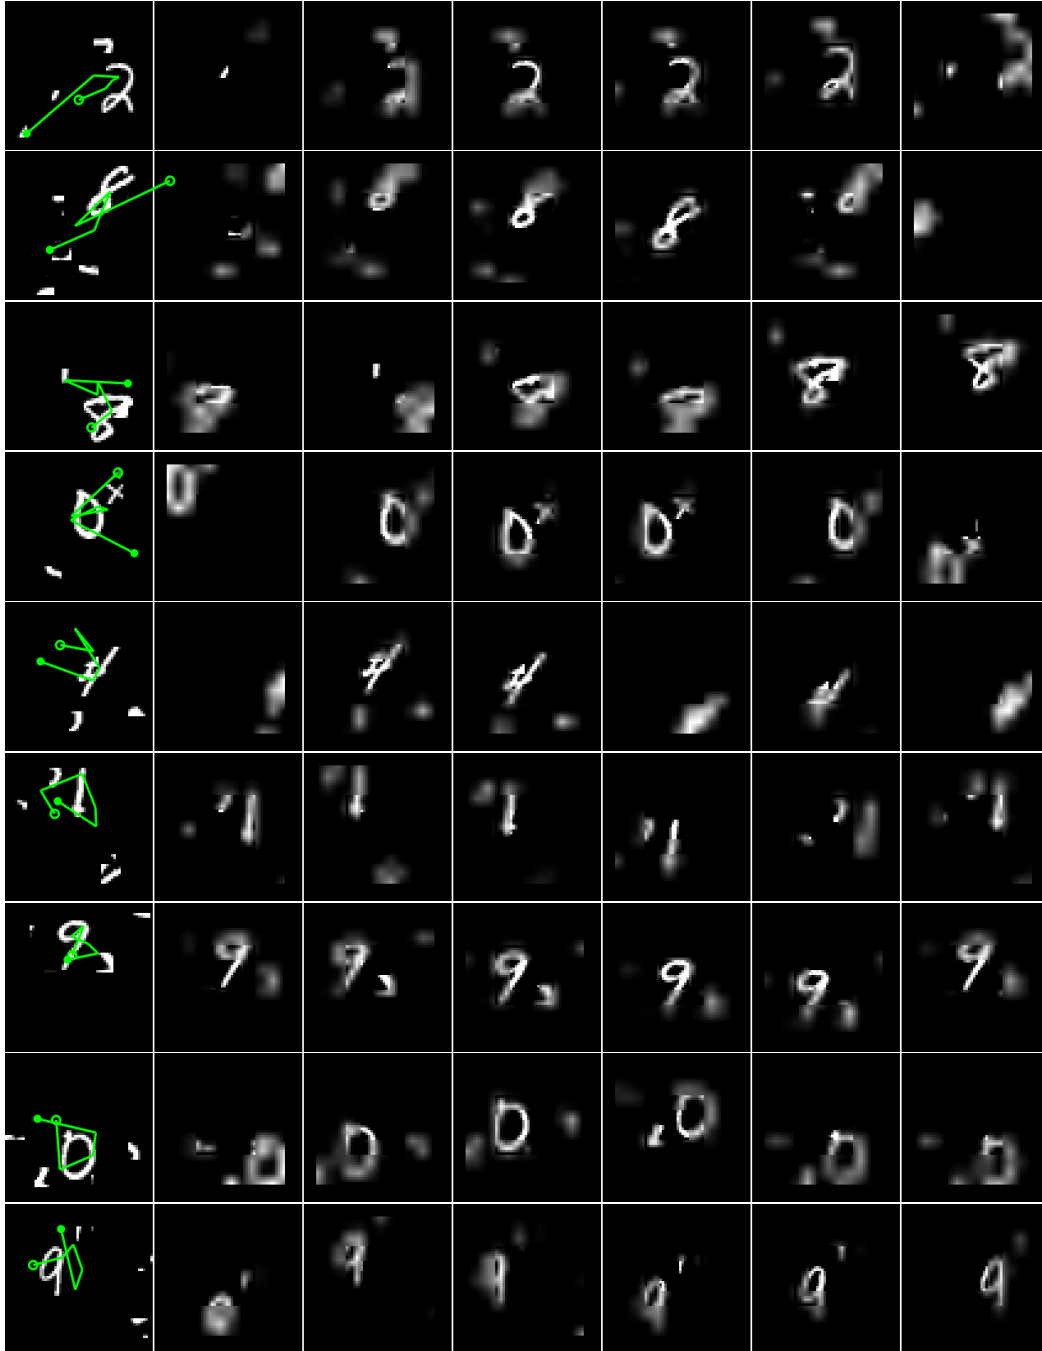

Figure 2: Examples of the learned policy on  $60 \times 60$  cluttered-translated MNIST task. Column 1: The input image from MNIST test set with glimpse path overlaid in green (correctly classified) or red (false classified). Columns 2-7: The six glimpses the network chooses. The center of each image shows the full resolution glimpse, the outer low resolution areas are obtained by upscaling the low resolution glimpses back to full image size. The glimpse paths clearly show that the learned policy avoids computation in empty or noisy parts of the input space and directly explores the area around the object of interest.

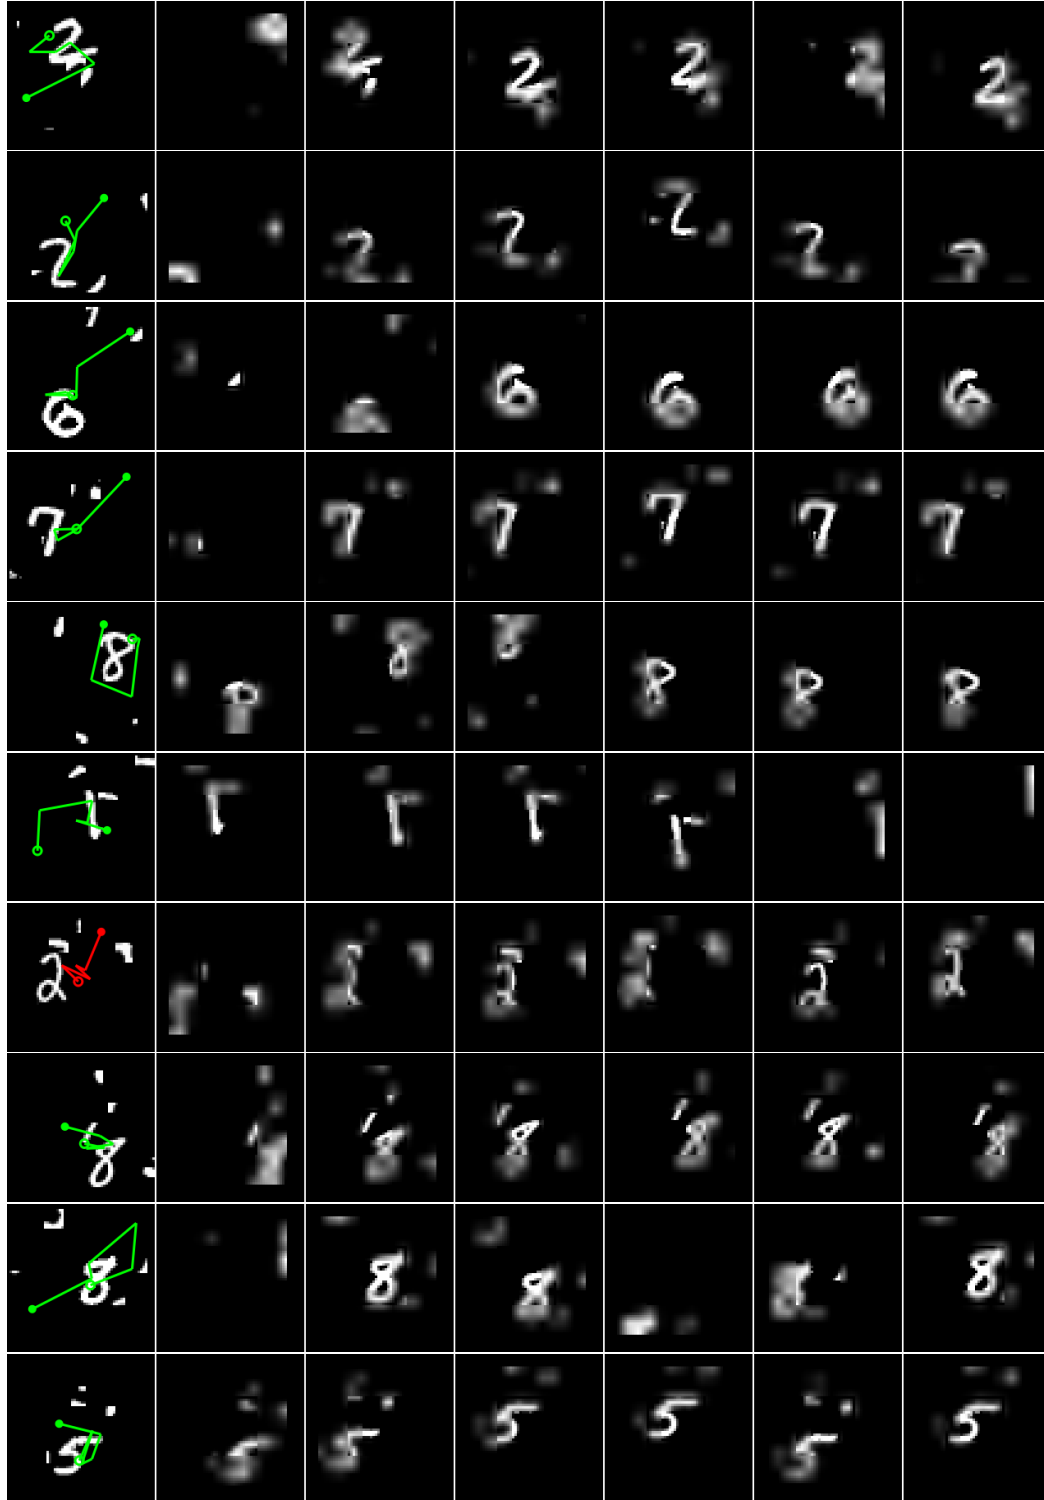

Figure 3: Examples of the learned policy on  $60 \times 60$  cluttered-translated MNIST task. Column 1: The input image from MNIST test set with glimpse path overlaid in green (correctly classified) or red (false classified). Columns 2-7: The six glimpses the network chooses. The center of each image shows the full resolution glimpse, the outer low resolution areas are obtained by upscaling the low resolution glimpses back to full image size. The glimpse paths clearly show that the learned policy avoids computation in empty or noisy parts of the input space and directly explores the area around the object of interest.
